# Supplementary material for: Tunable Magnetic Anisotropy and Dzyaloshinskii-Moriya Interaction in an Ultrathin van der Waals Fe3GeTe2/In2Se3 Heterostructure
Source: Frontiers journal article supplement (doi:10.3389/fphy.2020.587419), 2020-09-25
Supplement: Data_Sheet_1.doc [file Data_Sheet_1.doc]

Supplementary Information for:

“Tunable Magnetic Anisotropy and Dzyalosinskii-Moriya Interaction in an Ultrathin van der Waals

Fe3GeTe2/In2Se3 Heterostructure”

Dong Chen a,b, Wei Sun a, Hang Li a, Jianli Wang a, c* and Yuanxu Wang a*

*a Institute for Computational Materials Science, School of Physics and Electronics, Henan University, Kaifeng, 475004, P. R. China,*

*b College of Physics and Electronic Engineering, Xinyang Normal University, Xinyang, 464000, P. R. China,*

*c Institute for Superconducting and Electronic Materials, Australian Institute of Innovative Materials, University of Wollongong, NSW 2500, Australia.*

Part I. Calculation models and methods

The self-consistent electronic structure calculations are performed in the framework of density functional theory (DFT) by using the projected-augmented-wave (PAW) method [1], as implemented in Vienna *ab initio* Simulation Package (VASP) [2]. The Perdew-Burke-Ernzerhof (PBE) functional is utilized to treat the exchange-correlation energy [3]. The DFT-D3 method with the Becke-Jonson damping [4] is considered for the correction of van der Waals interactions in the hexagonal Fe3GeTe2 bulks and the tetragonal Fe3GeTe2/In2Se3 heterostructures. A vacuum space of 15 Å is set to minimize the interactions between the adjacent atomic layers of our HS system. We consider 13, 6, 8, 14, and 6 valence electrons for the In-4d105s25p1, Se-4s24p4, Fe-3d64s2, Ge-3d104s24p2, and Te-5s25p4 atoms, respectively. By performing accurate convergence tests, the VASP calculations are done according to a high cut-off energy of 500 eV. The *k*-meshes of 9×9×3 (bulk) and 7×5×1 (2D HS) with the Monkhorst-Pack gird [5] are adopted for the geometry optimization and a much denser *k*-point mesh (13×13×5 for bulk FGT and 15×9×1 for 2D HS) is used for the electronic structure calculations. On the one hand, all the DFT calculations are spin-polarized due to the magnetic nature of Fe. On the other hand, our HSs containing 3*d* transition metal Fe that are strong correlated systems.

Therefore, we use the on-site Coulomb interaction (GGA+*U*) scheme with an effective *U*eff = *U*－*J* to treat the correlated electrons [6]. For the bulk cases, both atomic coordinates and cell volumes are allowed to relax by VASP. For the modeled 2D HS, the atomic coordinates and the lattice constant *c* are fully relaxed (rippling of the layers and changes of interlayer distances) until the Hellmann-Feynman force on each atom is lower than 0.01 eV/Å, and the energy tolerance of the structural relaxation is set to be 10-6 eV. The spin-orbit coupling (SOC) effect is also considered in this work since it greatly effects on the Dzyaloshinskii-Moriya (DM) interaction. The parameter *U*eff has been carefully checked to give reliable results. For simplicity, we use *U* instead of *U*eff in the following paper, while the procedure for determining *U* is detailed in Fig. S1 of the Supporting Information. Since the in-plane lattice mismatch between the In2Se3 and Fe3GeTe2 compounds is very small (～0.7%), we adopt the in-plane lattice constants of In2Se3 (*a* = *b* = 4.0205 Å) [7] and consider no stacking disorder.

The total classical spin Hamiltonian of the Heisenberg model including DM interaction for our freestanding FGT monolayer and FGT/In2Se3 HS can be written as [8]

, (1)

where ***S*i,j,k,l** represents the unit spin vector, the third term is the DM interaction. Only two exchange coupling parameters are necessary: *J*1 between nearest neighbors in the *x-y* plane and *J*2 between nearest neighbors along the *z* axis. *J*1 and *J*2 are computed by performing a number of total energy calculations for several magnetic configurations of our HS system, and then fitting the energies with the results of a nearest-neighbor Heisenberg model [8]. The effective DM interaction coefficients can be obtained by neglecting the single-ion anisotropy.

Fig. S1. Equilibrium lattice constants *a* (blue-line) and *c* (red-line) (a) and the average magnetic moment *m* of the Fe atoms in the bulk Fe3GeTe2 as a function of *U* (b). Dashed lines represent the experimental data.

Fig. S1 shows the tested on-site Coulomb interaction with different effective Hubbard *U*. As it can be seen in Fig. S1(a) and (b), the lattice parameter *a* and the magnetic moment *m* of bulk Fe3GeTe2 agree well with the experimental data [9] when *U* = 0.5. The calculated lattice parameter *c* is also in agreement with the experimental data. The relative error is only 1.9% when *U* = 0.5. The fact that the effective *U* for the correlated Fe-3*d* orbital of the Fe3GeTe2 compound should not be large is confirmed by Refs. [10, 11]. For example, *U* = 2.0 or 6.0 leads to an obvious overestimation of the magnetic moment of Fe3GeTe2 [10].

Part II. The initial structure of the Fe3GeTe2/In2Se3 heterostructure


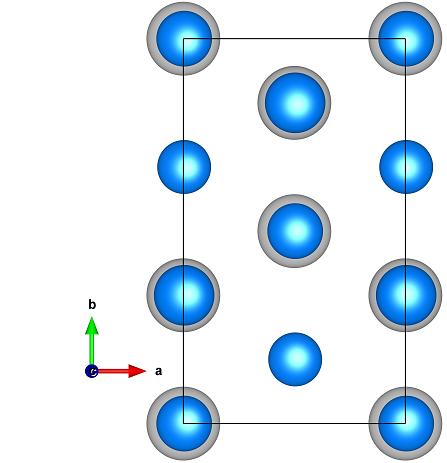


Fig. S2. The initial structure of the Fe3GeTe2/In2Se3 heterostructure with the experimental lattice parameters *a* = 4.0205 Å and *b* = 6.9637 Å (The blue and grey atoms represent the Fe3GeTe2 and In2Se3 layers, respectively).

**Table S1** Relative displacements between the Fe3GeTe2 and In2Se3 layers

|  | along *x* |  | along *y* |  | along *y*=*x* |  | along *y*=-*x* |
| --- | --- | --- | --- | --- | --- | --- | --- |
| No. | (*x*, *y*) /Å | No. | (*x*, *y*) /Å | No. | (*x*, *y*) /Å | No. | (*x*, *y*) /Å |
| 1 | (0.503, 0) | 9 | (0, 0.871) | 17 | (0.503, 0.871) | 25 | (-0.503, 0.871) |
| 2 | (1.005, 0) | 10 | (0, 1.742) | 18 | (1.005, 1.742) | 26 | (-1.005, 1.742) |
| 3 | (1.507, 0) | 11 | (0, 2.613) | 19 | (1.507, 2.613) | 27 | (-1.507, 2.613) |
| 4 | (2.010, 0) | 12 | (0, 3.484) | 20 | (2.010, 3.484) | 28 | (-2.010, 3.484) |
| 5 | (-0.503, 0) | 13 | (0, -0.871) | 21 | (-0.503, -0.871) | 29 | (0.503, -0.871) |
| 6 | (-1.005, 0) | 14 | (0, -1.742) | 22 | (-1.005, -1.742) | 30 | (1.005, -1.742) |
| 7 | (-1.507, 0) | 15 | (0, -2.613) | 23 | (-1.507, -2.613) | 31 | (1.507, -2.613) |
| 8 | (-2.010, 0) | 16 | (0, -3.484) | 24 | (-2.010, -3.484) | 32 | (2.010, -3.484) |

In order to obtain the ground state of the Fe3GeTe2/In2Se3 HS, 32 different models are taken into account. Starting from the initial structure shown in Fig. S2, the In2Se3 layers are fixed, while the Fe3GeTe2 layers are moved along the *x*-axis, the *y*-axis, the *y* = *x* direction, and the *y* = －*x* direction with different steps listed in Table S1. Then, the lattice parameters *a, b*, and the internal coordinates of these models are fully optimized, while the lattice parameter *c* is fixed. The results show that the ground-state structure of the Fe3GeTe2/In2Se3 HS correspond to the 28th structure. The most stable equilibrium states of these HSs are shown in Fig. 1(c) of the main text.

Part III. The band structures of the freestanding Fe3GeTe2 monolayer

and the Fe3GeTe2/In2Se3 heterostructure

(a) (b)

Fig. S3. The spin-up (a) and spin-down (b) band structures of the freestanding Fe3GeTe2 monolayer.

(a) (b)

(c) (d)

Fig. S4. The spin-up (a) and spin-down (b) band structures of the Fe3GeTe2/In2Se3 HS for the -*P* case, the spin-up (c) and spin-down (d) band structures of the Fe3GeTe2/In2Se3 HS for the +*P* case.

The band structures of the freestanding FGT monolayer and the Fe3GeTe2/In2Se3 HSs are shown in Figs. S3 and S4. No band gap can be seen in both the spin-up and spin-down channels, reflecting the metallic nature of the freestanding FGT monolayer and the FGT/In2Se3 HS. Similar to the DOS results given in the main text, the Fe-3d orbital dominates the band structures near the Fermi level, with minor hybridization with the Ge and Te atoms.

Part IV. The charge transfer between different 3*d* orbitals

**Table S2** The number of electrons for the five split 3*d* orbitals (*d*xy, *d*yz, *d*xz, *d*z2, and *d*x2-y2) of the two non-equivalent Fe1 and Fe2 atoms in the Fe3GeTe2 monolayer and the Fe3GeTe2/In2Se3 HS

| Materials | *FE* | atom | *d*xy | *d*yz | *d*xz | *d*z2 | *d*x2-y2 | total |
| --- | --- | --- | --- | --- | --- | --- | --- | --- |
| Freestanding FGT | 0 | Fe1 | 1.22 | 1.20 | 1.20 | 1.41 | 1.23 | 6.25 |
| Freestanding FGT | 0 | Fe2 | 1.29 | 1.39 | 1.39 | 1.11 | 1.29 | 6.48 |
| FGT/In2Se3 HS | +*P* | Fe1 | 1.22 | 1.19 | 1.19 | 1.41 | 1.22 | 6.24 |
| FGT/In2Se3 HS | +*P* | Fe2 | 1.28 | 1.39 | 1.39 | 1.11 | 1.28 | 6.46 |
| FGT/In2Se3 HS | －*P* | Fe1 | 1.22 | 1.19 | 1.19 | 1.41 | 1.22 | 6.24 |
| FGT/In2Se3 HS | －*P* | Fe2 | 1.28 | 1.39 | 1.39 | 1.12 | 1.29 | 6.47 |

The 3d electron is one of the most important intrinsic factors to determine the magnetic properties of materials. Our calculated 3*d* electrons with majority spin for Fe1/Fe2 atoms of the freestanding FGT are 0.89/0.81 (*d*xy), 0.86/0.85 (*d*yz), 0.86/0.85 (*d*xz), 0.91/0.74 (*d*z2), 0.89/0.81 (*d*x2-y2). Compared with the results listed in Table S2, it is safely concluded that all Fe atoms are in the high-spin states. The five split Fe-3*d* orbitals for the –*P* and +*P* HSs have almost the same number of electrons compared with the freestanding FGT, which indicate that the almost unchanged Fe-3*d* electrons lead to the unchanged magnetic configurations and magnetic moments of our HSs.

**References**

1 Blöchl, P. E. (1994). Projector augmented-wave method. *Phys. Rev. B* 50, 17953. doi: 10.1103/PhysRevB.50.17953

2 Kresse, G., and Furthmüller, J. (1996). Efficient iterative schemes for ab initio total-energy calculations using a plane-wave basis set. *Phys. Rev. B* 54, 11169. doi: 10.1103/PhysRevB.54.11169

3 Perdew, J. P., Burke, K., and Ernzerhof, M. (1997). Generalized gradient approximation made simple. *Phys. Rev. Lett.* 77, 3865-3868. doi: 10.1103/PhysRevLett.77.3865

4 Grimme, S., Ehrlich, S., and Goerigk, L. (2011). Effect of the damping function in dispersion corrected density functional theory. *J. Comput. Chem.* 32, 1456-1465. doi: 10.1002/jcc.21759

5 Monkhorst, H. J., and Park, J. D. (1976). Special points for Brillouin-zone integrations. *Phys. Rev. B* 13, 5188-5192. doi: 10.1103/PhysRevB.13.5188

6 Dudarev, S. L., Botton, G. A., Savrasov, S. Y., Humphreys, C. J., and Sutton, A. P. (1998). Electron-energy-loss spectra and the structural stability of nickel oxide: an LSDA+U study. *Phys. Rev. B* 57, 1505-1509. doi: 10.1103/PhysRevB.57.1505

7 Jacobs-Gedrim, R. B., Shanmugam, M., Jain, N., Durcan, C. A., Murphy, M. T., Murray, T. M., et al. (2014). Extraordinary photoresponse in two-dimensional In2Se3 nanosheets. *ACS Nano* 8, 514-521. doi: 10.1021/nn405037s

8 Cheng, Y., Yu, S. S., Zhu, M. L., Hwang, J., and Yang, F. Y. (2019). Evidence of the topological Hall effect in Pt/antiferromagnetic insulator bilayers. *Phys. Rev. Lett.* 123, 237206. doi: 10.1103/PhysRevLett.123.237206

9 Yi, J., Zhuang, H., Zou, Q., Wu, Z., Cao, G., Tang, S., et al. (2017). Competing antiferromagnetism in a quasi-2D itinerant ferromagnet: Fe3GeTe2. *2D Mater.* 4, 011005. doi: 10.1088/2053-1583/4/1/011005

10 Zhuang, H. L., Kent P. R. C., and Hennig, R. G. (2016). Strong anisotropy and magnetostriction in the two-dimensional Stoner ferromagnet Fe3GeTe2. *Phys. Rev. B* 93, 134407. doi: 10.1103/PhysRevB.93.134407

11 Deng, Y., Yu, Y., Song, Y., Zhang, J., Wang, N. Z., Sun, Z., et al. (2018). Gate-tunable room-temperature ferromagnetism in two-dimensional Fe3GeTe2. *Nature* 563, 94-99. doi: 10.1038/s41586-018-0626-9
